# Supplementary material for: mTORC1 activation decreases autophagy in aging and idiopathic pulmonary fibrosis and contributes to apoptosis resistance in IPF fibroblasts
Source: PubMed Central journal article supplement (PMC6398527; doi:10.1111/acel.12514), 2016-08-26
Supplement: ACEL-15-1103-s005.pdf [file ACEL-15-1103-s005.pdf]

**Table S1.** Age and sex of enrolled subjects and patients with IPF

| <b>Group 1</b> | <b>Age</b> | <b>Sex</b> | <b>Group 2</b> | <b>Age</b> | <b>Sex</b> | <b>Group 3</b> | <b>Age</b> | <b>Sex</b> |
|----------------|------------|------------|----------------|------------|------------|----------------|------------|------------|
| Young 1        | 15         | F          | Old 1          | 54         | M          | IPF 1          | 60         | M          |
| Young 2        | 16         | M          | Old 2          | 64         | M          | IPF 2          | 64         | M          |
| Young 3        | 33         | F          | Old 3          | 68         | M          | IPF 3          | 67         | M          |
| Young 4        | 33         | F          | Old 4          | 70         | M          | IPF 4          | 68         | M          |
| Young 5        | 33         | M          | Old 5          | 71         | M          | IPF 5          | 68         | M          |
| Young 6        | 42         | M          | Old 6          | 72         | M          | IPF 6          | 70         | M          |
| <b>Mean</b>    | <b>29</b>  |            | <b>Mean</b>    | <b>67</b>  |            | <b>Mean</b>    | <b>66</b>  |            |
| <b>SD</b>      | <b>11</b>  |            | <b>SD</b>      | <b>7</b>   |            | <b>SD</b>      | <b>4</b>   |            |
