# Supplementary material for: mTORC1 activation decreases autophagy in aging and idiopathic pulmonary fibrosis and contributes to apoptosis resistance in IPF fibroblasts
Source: PubMed Central journal article supplement (PMC6398527; doi:10.1111/acel.12514), 2016-08-26
Supplement: ACEL-15-1103-s006.pdf [file ACEL-15-1103-s006.pdf]

**Table S2.** Changes in the expression of autophagy-related genes with aging (complete list).

| Gene Symbol | Fold regulation | p value      |
|-------------|-----------------|--------------|
| AKT1        | 4.2             | <b>0.045</b> |
| ATG16L1     | 3.2             | 0.077        |
| TNF         | 3.2             | 0.106        |
| BCL2L1      | 2.6             | <b>0.023</b> |
| ATG4B       | 2.5             | <b>0.025</b> |
| FAM176A     | 2.5             | 0.064        |
| HSP90AA1    | 2.4             | 0.019        |
| ATG12       | 2.3             | <b>0.02</b>  |
| SQSTM1      | 2.1             | 0.103        |
| EIF4G1      | 2               | 0.152        |
| HSPA8       | 2               | 0.182        |
| BCL2        | 2               | 0.051        |
| TGM2        | 1.9             | 0.353        |
| SNCA        | 1.8             | 0.461        |
| IRGM        | 1.8             | 0.252        |
| ULK1        | 1.7             | 0.234        |
| ARSA        | 1.7             | 0.258        |
| TMEM74      | 1.7             | 0.18         |
| GABARAPL1   | 1.7             | 0.26         |
| ATG9B       | 1.7             | 0.35         |
| UVRAG       | 1.7             | 0.108        |
| GAA         | 1.6             | 0.221        |
| BAX         | 1.6             | 0.19         |
| TGFB1       | 1.6             | 0.199        |
| MAPK14      | 1.5             | 0.095        |
| CTSB        | 1.4             | 0.684        |
| TP53        | 1.4             | 0.337        |
| ATG16L2     | 1.4             | 0.369        |
| PIK3CG      | 1.4             | 0.285        |
| ATG9A       | 1.4             | 0.619        |
| HGS         | 1.4             | 0.301        |
| ATG3        | 1.3             | 0.392        |
| FAS         | 1.3             | 0.385        |
| FADD        | 1.3             | 0.387        |
| ATG4C       | 1.3             | 0.284        |
| ATG5        | 1.3             | 0.301        |
| DRAM1       | 1.3             | 0.301        |
| PIK3R4      | 1.3             | 0.301        |
| ESR1        | 1.3             | 0.586        |
| CLN3        | 1.3             | 0.359        |
| TP73        | 1.3             | 0.671        |
| IFNA2       | 1.2             | 0.651        |
| ATG4A       | 1.2             | 0.704        |
| MAP1LC3A    | 1.2             | 0.685        |
| RGS19       | 1.2             | 0.451        |
| ATG10       | 1.2             | 0.407        |

|           |      |              |
|-----------|------|--------------|
| CTSS      | 1.2  | 0.94         |
| ATG4D     | 1.2  | 0.513        |
| PRKAA1    | 1.2  | 0.482        |
| IFNA4     | 1.1  | 0.875        |
| APP       | 1.1  | 0.861        |
| BAK1      | 1.1  | 0.641        |
| BECN1     | 1.1  | 0.745        |
| NFKB1     | 1.1  | 0.93         |
| MAPK8     | 1.1  | 0.613        |
| PIK3C3    | 1.1  | 0.683        |
| RB1       | 1.1  | 0.613        |
| MAP1LC3B  | 1.1  | 0.978        |
| BAD       | 1    | 0.927        |
| CDKN2A    | 1    | 0.766        |
| EIF2AK3   | 1    | 0.975        |
| RPS6KB1   | 1    | 0.927        |
| DRAM2     | 1    | 0.927        |
| CASP8     | 1    | 0.928        |
| CXCR4     | 1    | 0.717        |
| RAB24     | 1    | 0.813        |
| HDAC1     | 1    | 0.939        |
| HTT       | -1.1 | 0.65         |
| BID       | -1.1 | 0.987        |
| CDKN1B    | -1.1 | 0.528        |
| GABARAP   | -1.1 | 0.927        |
| IFNG      | -1.1 | 0.452        |
| PRKAA2    | -1.2 | 0.516        |
| AMBRA1    | -1.2 | 0.823        |
| PTEN      | -1.2 | 0.279        |
| GABARAPL2 | -1.3 | 0.794        |
| TNFSF10   | -1.5 | 0.377        |
| ATG7      | -1.5 | 0.077        |
| BNIP3     | -1.6 | 0.19         |
| IGF1      | -1.6 | 0.386        |
| INS       | -1.7 | 0.333        |
| ULK2      | -2.1 | 0.183        |
| CASP3     | -2.1 | <b>0.026</b> |
| DAPK1     | -2.2 | 0.123        |
